## Subject Index

### Acetylcholine

synthesis and storage in *Pleurodeles* embryo cultures: DUPRAT AND OTHERS 167

### Actin

genes in *Xenopus* and their developmental control: GORDON, MOHUN, BRENNAN & CASCIO 125

role in development of *Xenopus*: WYLIE, BROWN, GODSAVE, QUARMBY & HEASMAN 1

### *Ambystoma mexicanum* (axolotl)

embryo

regional specificity of glycoconjugates: SLACK, CLEINE & SMITH 137

evidence for role of fibronectin gastrulation: BOUCAUT AND OTHERS 211

monoclonal antibody to an epidermal marker: JONES 155

role of fibronectin in gastrulation: BOUCAUT AND OTHERS 211

sperm

role of extragenic components in early axolotl development: MALACINSKI & BARONE 53

### Amphibia

cell lineage labels and region-specific markers: SMITH, DALE & SLACK 317

inductive interactions in early development: NIEUWKOOP 335

information transfer during embryonic induction: GRUNZ 349

maturation promoting factors and cell cycle regulation: FORD 271

role of gap junctions in development: WARNER 365

single cell analysis of commitment in early embryogenesis: HEASMAN, SNAPE, SMITH & WYLIE 297

### Antibody

to gap junctional protein in amphibian development: WARNER 365

### Blastomere

*Xenopus*

isolation and axial body specification: COOKE 69

### Body pattern

specification in early development of *Xenopus*: COOKE 69

### Calcium ionophore A 32187

information transfer during embryonic inductions in amphibia: GRUNZ 349

### Cardiac actin

control of gene activity in *Xenopus*: GURDON, MOHUN, BRENNAN & CASCIO 125

### Catecholamines

synthesis and storage in *Pleurodeles* embryo cultures: DUPRAT AND OTHERS 167

### cDNA cloning

subtractive, in *Xenopus* embryogenesis: DAWID AND OTHERS 113

### Cell adhesion

role in vertebrate neurulation and relation to birth defects: GORDON 229

### Cell cycle

chromosome replication in early development of *Xenopus*: LASKEY 285

regulation in amphibia and maturation promoting factors: FORD 271

### Cell movement

during convergent extension in gastrulation of *Xenopus*: KELLER, DANILCHIK, GIMLICH & SHIH 185

evidence for role of fibronectin in amphibian gastrulation: BOUCAUT AND OTHERS 211

### Choline acetyl transferase

changes in activity in *Pleurodeles* embryos: DUPRAT AND OTHERS 167

### Chordamesoderm

induction in *Xenopus* embryos: GIMLICH 85

### Commitment

single cell analysis in early embryogenesis: HEASMAN, SNAPE, SMITH & WYLIE 297

### Competence

inductive interactions in early amphibian development: NIEUWKOOP 335

### Computational embryology

theories of vertebrate neurulation and relation to birth defects: GORDON 229

### Concanavalin A

information transfer during embryonic inductions in amphibia: GRUNZ 349

- Convergent extension**  
during gastrulation of *Xenopus*: KELLER, DANILCHIK, GIMLICH & SHIH 185
- Cyclic AMP**  
information transfer during embryonic inductions in amphibia: GRUNZ 349
- Cytokeratin**  
role in development of *Xenopus*: WYLIE, BROWN, GODSAVE, QUARMBY & HEASMAN 1
- Cytoplasmic**  
clock and temporal control of early embryonic development in amphibians: SATOH 257  
determinants in *Xenopus* development: WYLIE, BROWN, GODSAVE, QUARMBY & HEASMAN 1  
determinant and developmental regulation of genes in *Xenopus*: GURDON, MOHUN, BRENNAN & CASCIO 125  
localization and chordamesoderm induction in frog embryo: GIMLICH 89
- Cytoskeletal actin**  
control of gene activity in *Xenopus*: GURDON, MOHUN, BRENNAN & CASCIO 125
- Cytoskeleton**  
in maturation of *Xenopus* oocytes: HAUSEN, WANG, DREYER & STICK 17  
role in development of *Xenopus* oocytes: WYLIE, BROWN, GODSAVE, QUARMBY & HEASMAN 1
- Cytostatic factor**  
and cell cycle regulation in amphibia: FORD 271
- Determination**  
inductive interactions in early amphibian development: NIEUWKOOP 335  
single cell analysis of commitment in early embryogenesis: HEASMAN, SNAPE, SMITH & WYLIE 297
- DNA replication**  
and cell cycle regulation in amphibia: FORD 271  
and chromatin assembly in early *Xenopus*: LASKEY 285  
and temporal control of early embryonic development in amphibians: SATOH 257
- Dorsalization**  
analysis with cell lineage labels and region-specific markers: SMITH, DALE & SLACK 317
- Electrophysiological coupling**  
role in amphibian development: WARNER 365
- Epidermal**  
keratins and gene expression in *Xenopus* embryogenesis: DAWID AND OTHERS 113
- Epidermis**  
development in *Xenopus* - monoclonal antibody to an epidermal marker: JONES 155
- Epimucin**  
relationship to epidermal antigen in *Xenopus*: JONES 155
- Epithelia**  
theories of vertebrate neurulation and relation to birth defects: GORDON 229
- Eulerian buckling**  
theories of vertebrate neurulation and relation to birth defects: GORDON 229
- Extracellular matrix**  
evidence for role of fibronectin in amphibian gastrulation: BOUCAUT AND OTHERS 211
- Extragenic effect**  
role in early amphibian pattern specification: MALACINSKI & BARONE 53
- Fate map**  
for gastrulation in *Xenopus laevis*: KELLER, DANILCHIK, GIMLICH & SHIH 185  
for *Xenopus* early development and body axial plan: COOKE 69
- Fibronectin**  
evidence for role in amphibian gastrulation: BOUCAUT AND OTHERS 211
- Finite element analysis**  
theories of vertebrate neurulation and relation to birth defects: GORDON 229
- FLDx**  
and chordamesoderm development in *Xenopus*: GIMLICH 89  
and early development in *Xenopus*: COOKE 69  
used to study induction: SMITH, DALE & SLACK 317
- Fluorescein-lysine-dextran (FLDx)**  
used to study mechanism of convergent extension in *Xenopus*: KELLER, DANILCHIK, GIMLICH & SHIH 185
- G<sub>1</sub> phase**  
chromosome replication in early development of *Xenopus*: LASKEY 285
- G<sub>2</sub> phase**  
chromosome replication in early development of *Xenopus*: LASKEY 285
- Gap junction**  
role in amphibian development: WARNER 365

**Gastrulation**

evidence for role of fibronectin: BOUCAUT AND OTHERS 211

*Xenopus laevis*

function and mechanism of convergent extension: KELLER, DANILCHIK, GIMLICH & SHIH 185

**Gene**

expression in *Xenopus* embryogenesis: DAWID AND OTHERS 113

**Germinal vesicle**

in maturation of *Xenopus* oocytes: HAUSEN, WANG, DREYER & STICK 17

**Germ plasm**

origin in *Xenopus* development: WYLIE, BROWN, GODSAVE, QUARMBY & HEASMAN 1

**Globin mRNA**

role in translational control in *Xenopus* oocytes: TAYLOR, ROBINSON & SMITH 35

**Glycolipids**

regional specificity in *Xenopus* and axolotl embryos: SLACK, CLEINE & SMITH 137

**Glycoproteins**

regional specificity in *Xenopus* and axolotl embryos: SLACK, CLEINE & SMITH 137

**Gradients**

and developmental control of actin genes in *Xenopus*: GURDON, MOHUN, BRENNAN & CASCIO 125

**Gravity**

reorientation and axial body plan specification: COOKE 69

**Induction**

and developmental control of actin genes in *Xenopus*: GURDON, MOHUN, BRENNAN & CASCIO 125

cell lineage labels and region-specific markers: SMITH, DALE & SLACK 317

in axolotl and *Xenopus* embryos—synthesis of glycoconjugates: SLACK, CLEINE & SMITH 137

in early amphibian development: NIEUW-KOOP 335

information transfer during embryonic inductions in amphibia: GRUNZ 349

mesoderm—role of gap junctions: WARNER 365

neural—role of gap junctions: WARNER 365

of neural structures in *Pleurodeles waltl*: DUPRAT AND OTHERS 167

single cell analysis of commitment in early embryogenesis: HEASMAN, SNAPE, SMITH & WYLIE 297

**Inductive interaction**

cell lineage labels and region-specific markers: SMITH, DALE & SLACK 317

in early amphibian development: NIEUW-KOOP 335

**Intracellular**

pH—role in transitional control in *Xenopus* oocytes: TAYLOR, ROBINSON & SMITH 35

**Keratins**

epidermal, and gene expression in *Xenopus* embryogenesis: DAWID AND OTHERS 113

**Lamin L III**

distribution during maturation of *Xenopus* oocyte: HAUSEN, HUI, DREYER & STICK 17

**Lectins**

regional binding patterns in *Xenopus* and axolotl: SLACK, CLEINE & SMITH 137

**Lucifer Yellow**

used to study role of gap junctions in amphibian development: WARNER 365

**Marginal zone**

movement during convergent extension in *Xenopus* gastrulation: KELLER, DANILCHIK, GIMLICH & SHIH 185

**Maternal effect**

role in early amphibian pattern specification: MALACINSKI & BARONE 53

**Maturation promoting factor (MPF)**

and cell cycle regulation in amphibia: FORD 271

and temporal control of early embryonic development in amphibia: SATOH 257

chromosome replication in early development of *Xenopus*: LASKEY 285

effect on ribosomal protein phosphorylation in *Xenopus* oocyte: TAYLOR, ROBINSON & SMITH 35

**Maturation**

of *Xenopus* oocyte—distribution of nuclear proteins: HAUSEN, WANG, DREYER & STICK 17

**Meiosis**

and cell cycle regulation in amphibia: FORD 271

**Mesoderm**

formation in *Xenopus* and convergent extension during gastrulation: KELLER, DANILCHIK, GIMLICH & SHIH 185

induction in *Xenopus* embryos: GIMLICH 89

induction—use of cell lineage label and region-specific markers: SMITH, DALE & SLACK 317

induction and information transfer in amphibia: GRUNZ 349

**Microfilaments**

role in vertebrate neurulation and relation to birth defects: GORDON 229

**Microtubules**

role in vertebrate neurulation and relation to birth defects: GORDON 229

**Midblastula transition (MBT)**

onset of gene activity: DAWID AND OTHERS 113

**Mitochondrial**

mitochondrial RNA synthesis in *Xenopus* embryogenesis: DAWID & OTHERS 113

**Mitosis**

and cell cycle regulation in amphibia: FORD 271

chromosome replication in early development of *Xenopus*: LASKEY 285

**Monoclonal antibody**

regional binding patterns in *Xenopus* and axolotl: SLACK, CLEINE & SMITH 137

study of inductive interactions in amphibia: SMITH, DALE & SLACK 317

to an epidermal marker in *Xenopus*: JONES 155

**Monovalent antibody**

to fibronectin—arrests gastrulation in amphibia: BOUCAUT AND OTHERS 211

**MPF (See Maturation promoting factor)****Neural induction**

embryonic determination in *Pleurodeles waltl*: DUPRAT AND OTHERS 167

information transfer in amphibia: GRUNZ 349

use of cell lineage label and region-specific markers: SMITH, DALE & SLACK 317

**Neural plate**

theories of vertebrate neurulation and relation to birth defects: GORDON 229

**Neural tube**

defects in vertebrates and theories of neurulation: GORDON 229

**Neurofilaments**

changes in activity of polypeptides in *Pleurodeles* embryos: DUPRAT AND OTHERS 167

**Neurons**

differentiation in *Pleurodeles waltl* embryos: DUPRAT AND OTHERS 167

**Neurotransmitters**

synthesis and storage in *Pleurodeles* embryo cultures: DUPRAT AND OTHERS 167

**Neurulation**

theories and relationship to neural tube birth defects: GORDON 229

**Notochord**

formation in *Xenopus* and convergent extension during gastrulation

**Nucleocytoplasmic ratio**

and temporal control of early embryonic development in amphibia: SATOH 257

**Nucleoplasmin**

distribution during maturation of *Xenopus* oocyte: HAUSEN, WANG, DREYER & STICK 17

**Oocyte**

amphibia

maturation promoting factor and cell cycle regulation: FORD 271

*Xenopus*

distribution of nuclear proteins during maturation: HAUSEN, WANG, DREYER & STICK 17

role of cytoskeleton in development: WYLIE, BROWN, GODSAVE, QUARMBY & HEASMAN 1

transitional control by intracellular pH and protein phosphorylation: TAYLOR, ROBINSON & SMITH 35

**Oogenesis**

in *Xenopus*—role of cytoskeleton in development: WYLIE, BROWN, GODSAVE, QUARMBY & HEASMAN 1

**Parental mutant**

*ts-1* in axolotl: MALACINSKI & BARONE 53

**Paternal effect**

role in early amphibian pattern specification: MALACINSKI & BARONE 53

**Pattern**

specification in early development of *Xenopus*: COOKE 69

**pH**

intracellular—role in transitional control in *Xenopus* oocytes: TAYLOR, ROBINSON & SMITH 35

**Phosphorylation**

of ribosomal protein—in translational control in *Xenopus* oocytes: TAYLOR, ROBINSON & SMITH 35

***Pleurodeles waltl***

embryo

neural induction and expression of specific neuronal traits: DUPRAT AND OTHERS 167

evidence for role of fibronectin gastrulation: BOUCAUT AND OTHERS 211

- Poly A<sup>+</sup> RNA**  
in *Xenopus* embryogenesis: DAWID AND OTHERS 113
- Precleavage**  
events in *Xenopus* and axial body specification: COOKE 69
- Protein**  
ribosomal—role in translational control in *Xenopus* oocytes: TAYLOR, ROBINSON & SMITH 35  
synthesis  
role in translational control in *Xenopus* oocytes: TAYLOR, ROBINSON & SMITH 35
- Proteoglycans**  
regional specificity in *Xenopus* and axolotl embryos: SLACK, CLEINE & SMITH 137
- Replication**  
chromosomal—origins in early development of *Xenopus*: LASKEY 285
- Ribonucleic acid (RNA)**  
role in translational control in *Xenopus* oocytes: TAYLOR, ROBINSON & SMITH 35  
synthesis of poly A<sup>+</sup> in *Xenopus* embryogenesis: DAWID AND OTHERS 113
- Ribosomal**  
protein—role in translational control in *Xenopus* oocytes: TAYLOR, ROBINSON & SMITH 35
- Romeis fixative**  
used to study distribution of nuclear proteins: HAUSEN, HUI, DREYER & STICK 17
- Single cell**  
transplantation and chordamesoderm development in *Xenopus*: GIMLICH 89
- Skeletal actin**  
control of gene activity in *Xenopus*: GURDON, MOHUN, BRENNAN & CASCIO 125
- Specification**  
cell lineage labels and region-specific markers: SMITH, DALE & SLACK 317  
in axolotl and *Xenopus* embryos—synthesis of glycoconjugates: SLACK, CLEINE & SMITH 137  
information transfer during embryonic inductions in amphibia: GRUNZ 349  
in neural induction in embryos of *Pleurodeles waltl*: DUPRAT AND OTHERS 167  
in *Xenopus* epidermal development: JONES 155  
of axial body plan in *Xenopus* after early perturbations: COOKE 69  
of *Xenopus* dorsal embryonic body axis: GIMLICH 89  
single cell analysis of commitment in early embryogenesis: HEASMAN, SNAPE, SMITH & WYLIE 297
- Sperm**  
role of extragenic components in axolotl early development: MALACINSKI & BARONE 53
- S phase**  
chromosome replication in early development of *Xenopus*: LASKEY 285
- Subtractive**  
cDNA cloning in *Xenopus* embryogenesis: DAWID AND OTHERS 113
- Synthetic peptides**  
inhibition of mesodermal cell migration in amphibian gastrulation: BOUCAUT AND OTHERS 211
- Temporal control**  
of early embryonic development in amphibians: SATOH 257
- Texas red**  
used to study role of gap junctions in amphibian development: WARNER 365
- Timing mechanism**  
for early embryonic development in amphibians: SATOH 257
- Translational control**  
role of intracellular pH and ribosomal protein in *Xenopus* oocytes: TAYLOR, ROBINSON & SMITH 35
- Transplantation**  
of single cells and chordamesoderm development in *Xenopus*: GIMLICH 89
- TRITC (tetramethyl rhodamine isothiocyanate)**  
used in study of single cell analysis of commitment: HEASMAN, SNAPE, SMITH & WYLIE 297
- ts-1 mutant**  
in axolotl—model system for extragenic effects: MALACINSKI & BARONE 53
- Tubulin**  
role in development of *Xenopus*: WYLIE, BROWN, GODSAVE, QUARMBY & HEASMAN 1
- Tunicamycin**  
information transfer during embryonic inductions in amphibia: GRUNZ 349
- Vimentin**  
distribution in early *Xenopus* development: WYLIE, BROWN, GODSAVE, QUARMBY & HEASMAN 1

***Xenopus borealis***

monoclonal antibody to an epidermal marker: JONES 155

***Xenopus laevis***

actin genes and their developmental control: GURDON, MOHUN, BRENNAN & CASCIO 125

early development

specification of body axial plan: COOKE 69

embryo

cytoplasmic localization and chordamesoderm induction: GIMLICH 89

regional specificity of glycoconjugates: SLACK, CLEINE & SMITH 137

gene expression in embryogenesis: DAWID AND OTHERS 113

maturation promoting factors and amphibian chromosome replication: LASKEY 285

monoclonal antibody to an epidermal marker: JONES 155

oocyte

role of cytoskeleton in early development: WYLIE, BROWN, GODSAVE, QUARMBY & HEASMAN 1

role of cytoskeleton in early development: WYLIE, BROWN, GODSAVE, QUARMBY & HEASMAN 1

**Yolk platelets**

distribution during maturation of *Xenopus*

oocyte: HAUSEN, WANG, DREYER & STICK 17
